# Supplementary material for: Physicochemical and Adsorption Characterization of Char Derived from Resorcinol–Formaldehyde Resin Modified with Metal Oxide/Silica Nanocomposites
Source: MDPI journal article supplement (doi:10.3390/ma17091981), 2024-04-24

# Characterization of char derived from resorcinol-formaldehyde resin modified with metal oxide/silica nanocomposites

Mariia Galaburda<sup>1,2</sup>, Dariusz Sternik<sup>1</sup>, Agnieszka Chrzanowska<sup>1</sup>, Olena Oranska<sup>2</sup>, Yurii Kovalov<sup>3</sup>, Anna Derylo-Marczewska<sup>1</sup>

<sup>1</sup> Faculty of Chemistry, Maria Curie-Skłodowska University, Maria Curie-Skłodowska Sq.3, 20-031 Lublin, Poland; mariia.galaburda@gmail.com (M.G.); dariusz.sternik@mail.umcs.pl (D.S.); agnieszka.chrzanowska@mail.umcs.pl (A.C.); anna.derylo-marczewska@mail.umcs.pl (A.D.-M.)

<sup>2</sup> Chuiko Institute of Surface Chemistry, 17 General Naumov Str., Kyiv 03164, Ukraine; mariia.galaburda@gmail.com (M.G.); el.oranska@gmail.com (O.O)

<sup>3</sup> School of Chemistry, University of Bristol Cantock's Close, Bristol, BS8 1TS (UK); ununulium123@gmail.com (Y.K.)

\* Correspondence: anna.derylo-marczewska@mail.umcs.pl (A.D.-M.) Tel.: +48-8153-755-49; mariia.galaburda@gmail.com (M.G.)

It was noted, that in the case of degradation under nitrogen for the Ni samples, the peaks corresponding to CO<sub>2</sub> is broad and present two maxima at 350 and 550C.

The stretch vibration bands detected at 1150-1085 cm<sup>-1</sup> in RF-SiO<sub>2</sub> correspond to the C-O stretching in the aliphatic ether.

The absorbance of -OH stretching at 4000-3500 cm<sup>-1</sup> is associated with H<sub>2</sub>O and the phenolic hydroxyl group.

The stretch vibration bands detected at 3000-2500 cm<sup>-1</sup> correspond to the C-H group in the aldehyde or ketone compounds.

The absorbance of -OH stretching at 4000-3500 cm<sup>-1</sup> is associated with H<sub>2</sub>O and the phenolic hydroxyl group.

**Table S1.** Summarized results of the FTIR analysis for the most important peaks in Figure S1.

| Functional group | Wave number, cm <sup>-1</sup> |
|------------------|-------------------------------|
| CO <sub>2</sub>  | 600-750, 2400-2240, 3900-3500 |
| CO               | 1950-2150                     |

**Citation:** To be added by editorial staff during production.

Academic Editor: Firstname Last-name

Received: date

Revised: date

Accepted: date

Published: date

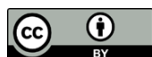

**Copyright:** © 2024 by the authors.

Submitted for possible open access publication under the terms and conditions of the Creative Commons

Attribution (CC BY) license

(<https://creativecommons.org/licenses/by/4.0/>).

|                  |                      |
|------------------|----------------------|
| H <sub>2</sub> O | 1300–2000, 3400–4000 |
| C–H              | 3000–2830            |
| C=O              | 1850–1600            |
| C=C              | 1600–1420            |

24

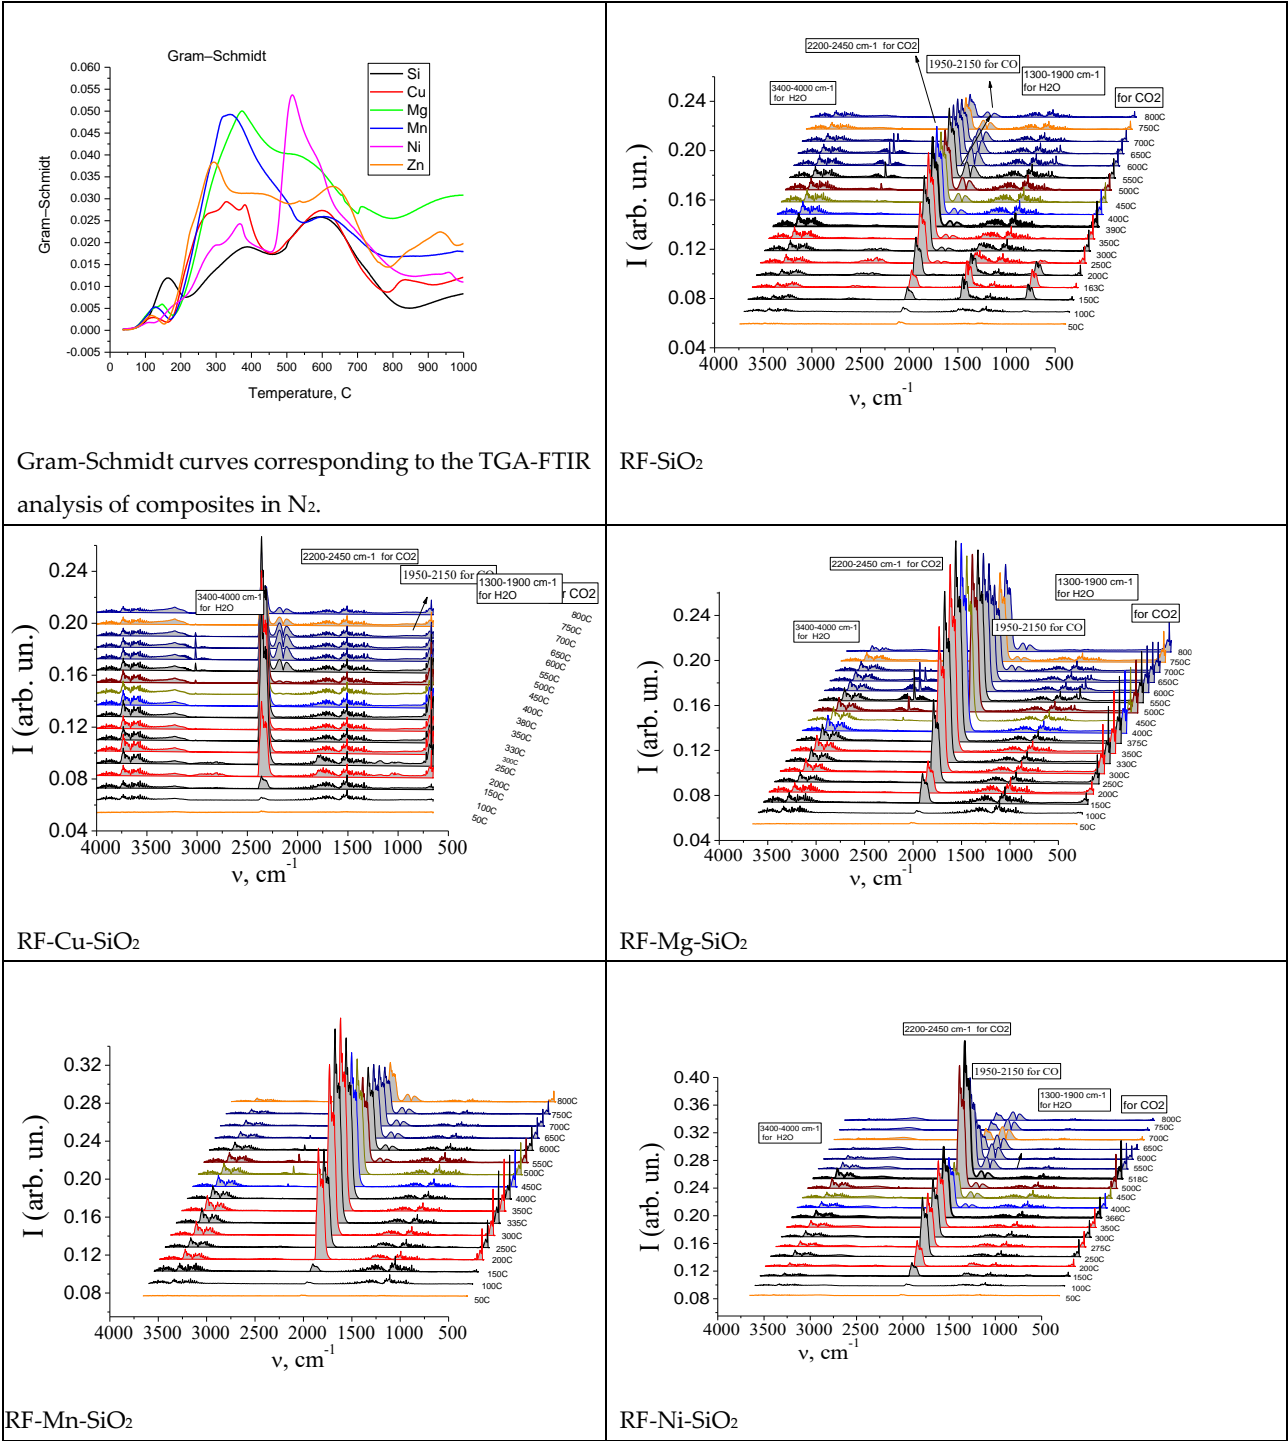

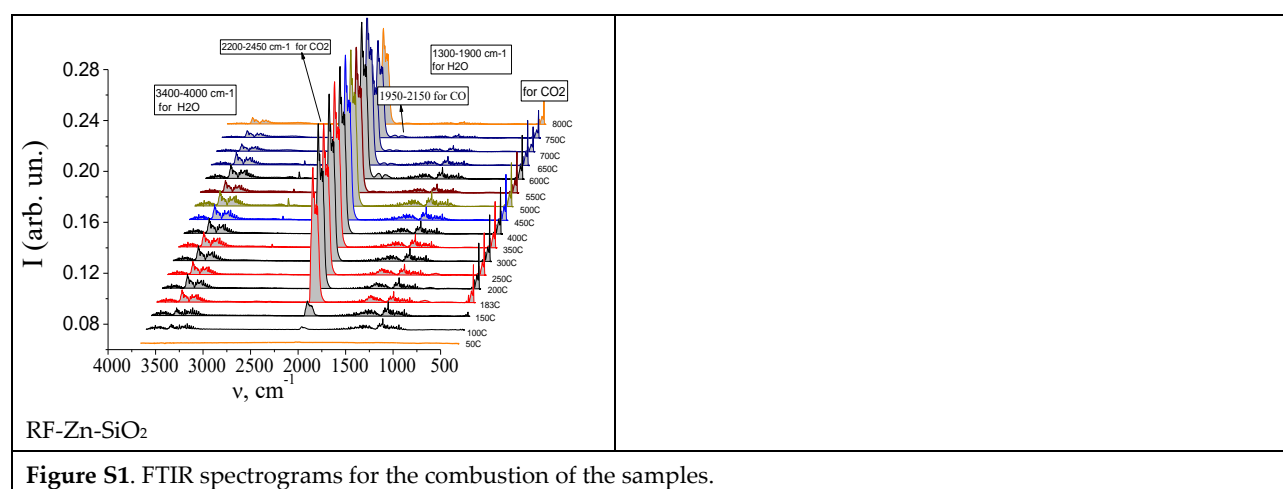

Supplement: s1 [file s1]
